# Supplementary material for: The average Pd oxidation state in Pd/SiO2 quantified by L3-edge XANES analysis and its effects on catalytic activity for CO oxidation
Source: Royal Society of Chemistry journal article supplement (doi:10.1039/c2cy00422d), 2011-12-20
Supplement: c2cy00422d.pdf [file c2cy00422d.pdf]

## Supporting information

### Average Pd oxidation state in Pd/SiO<sub>2</sub> quantified by L<sub>3</sub> edge XANES analysis and its effects on catalytic activity for CO oxidation

Ken-ichi Shimizu,<sup>\*a</sup> Yuichi Kamiya,<sup>b</sup> Kaoru Osaki,<sup>c</sup> Hisao Yoshida,<sup>d</sup> and Atsushi Satsuma<sup>c</sup>

<sup>a</sup> Catalysis Research Center, Hokkaido University, N-21, W-10, Sapporo 001-0021, Japan

<sup>b</sup> Research Faculty of Environmental Earth Science, Hokkaido University, Kita 10 Nishi 5, Sapporo 060-0810, Japan

<sup>c</sup> Department of Molecular Design and Engineering, Graduate School of Engineering, Nagoya University, Nagoya 464-8603, Japan

<sup>d</sup> Department of Applied Chemistry, Graduate School of Engineering, Nagoya University, Furo-cho, Chikusa-ku, Nagoya 464-8603, Japan

\*Corresponding author: e-mail: kshimizu@cat.hokudai.ac.jp, fax.: +81-11-706-9163

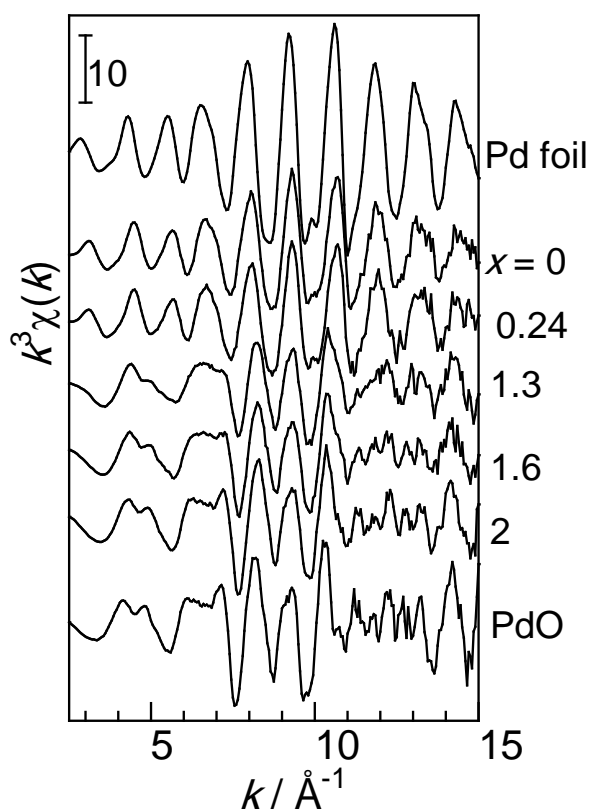

**Fig. S1.** Pd K-edge EXAFS for the reference compounds and the PdO<sub>*x*/2</sub>/SiO<sub>2</sub> samples with different average oxidation number (*x*).
